# Supplementary material for: Two novel bi-functional hybrid materials constructed from POMs and a Schiff base with excellent third-order NLO and catalytic properties
Source: Royal Society of Chemistry journal article supplement (doi:10.1039/c6dt00138f), 2016-01-01
Supplement: c6dt00138f1.pdf [file c6dt00138f1.pdf]

## Supporting Information

# Two novel bi-functional hybrid materials constructed from POMs and Schiff base with excellent third-order NLO and catalytic properties

Gonghao Hu<sup>a</sup>, Hao Miao<sup>a</sup>, Hua Mei,<sup>\*a</sup> Shuai Zhou<sup>a</sup> and Yan Xu<sup>\* a, b</sup>

<sup>a</sup>College of Chemistry and Chemical Engineering, State Key Laboratory of Materials-Oriented Chemical Engineering, Nanjing Tech University, Nanjing 210009, P. R. China

<sup>b</sup>Coordination Chemistry Institute, State Key Laboratory of Coordination Chemistry, Nanjing University, Nanjing 210093, P. R. China

### 1. Materials and Methods

2, 6-diacetylpyridine bis-(semicarbazone) (DAPSC) and potassium borotungstate ( $K_5BW_{12}O_{40}$ ) were prepared according to the literature. Other chemicals were purchased from commercial sources and used without further purification. Element analyses for C, H, and N were implemented on a Perkin-Elmer 2400 CHN elemental analyzer. IR spectra were recorded on KBr pellets with a Nicolet Impact 410 FTIR spectrometer in the range of 4000-400  $cm^{-1}$ . Single crystal X-ray diffraction data were collected on a Bruker APEX II diffractometer using Mo-K $\alpha$  monochromatized radiation ( $\lambda = 0.71073 \text{ \AA}$ ) at 296 K. TG analysis was performed on a Diamond TG-DSC thermal analyzer in flowing  $N_2$  with a heating rate of 10  $^{\circ}C \text{ min}^{-1}$ . X-ray powder diffraction data were obtained on Bruker D8X diffractometer using Cu-K $\alpha$  monochromatized radiation ( $\lambda = 1.5418 \text{ \AA}$ ) in the  $2\theta$  range of 5-50 $^{\circ}$  at room temperature.

### 2. Esterification of phosphoric acid with equimolar lauryl alcohol

The esterification of lauryl alcohol with equimolar phosphoric acid was performed in a 100ml three-necked round-bottomed flask. A powder of catalyst, phosphoric acid (0.10 mol, 85%

aqueous solution), and lauryl alcohol (0.10 mol) were charged into the flask.

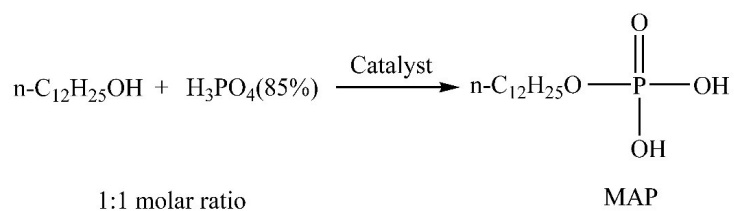

**Scheme S1.** Esterification of phosphoric acid with equimolar lauryl alcohol into MAP.

### 3. Synthesis

#### Synthesis of compound 1

A mixture of  $\text{Co}(\text{OAc})_2 \cdot 4\text{H}_2\text{O}$  (0.125 g, 0.50 mmol), DAPSC (0.020 g, 0.07 mmol),  $\text{K}_5\text{BW}_{12}\text{O}_{40} \cdot 11.4\text{H}_2\text{O}$  (0.100 g, 0.03 mmol), and 10 ml  $\text{H}_2\text{O}$  was stirred at room temperature for 30 min. Then the resulting solution was sealed in a 20 ml Teflon-line autoclave and kept at 80 °C for 3 days. After slowly cooling to room temperature, yellow schistose crystals (Fig. S1) of **1** were filtered, washed with distilled water, and dried in a desiccator to give a yield of 67 % (0.0723 g) based on DAPSC. Elemental analysis: Calcd (%): C, 8.56; H, 1.45; N, 6.35. Found (%): C, 8.49; H, 1.37; N, 6.30. IR of compound **1** ( $\text{cm}^{-1}$ ): 3416 (b), 2924 (s), 2854 (m), 1665 (s), 1384 (s), 999 (m), 953 (m), 914 (m), 826 (s).

#### Synthesis of compound 2

Compound **2** was prepared similarly to compound **1**, except that 0.50 mmol  $\text{Zn}(\text{OAc})_2 \cdot 2\text{H}_2\text{O}$  was used instead of  $\text{Co}(\text{OAc})_2 \cdot 4\text{H}_2\text{O}$ . Light yellow needle crystals (Fig. S2) of **2** were filtered, washed with distilled water, and dried in a desiccator to give a yield of 69 % (0.0747 g) based on DAPSC. Elemental analysis: Calcd (%): C, 8.56; H, 1.40; N, 6.35. Found (%): C, 8.42; H, 1.35; N, 6.28. IR of compound **2** ( $\text{cm}^{-1}$ ): 3416 (b), 2924 (s), 2851 (m), 1665 (s), 1384 (s), 998 (m), 953 (m), 913 (m), 827 (s).

### 4. Supplementary crystal Selected bond distances, bond angles and Structural Figures.

Single crystal X-ray diffraction data of compounds **1** and **2** were collected on a Bruker APEX II diffractometer using Mo-K $\alpha$  monochromatized radiation ( $\lambda = 0.71073 \text{ \AA}$ ) at 296 K. Empirical absorption correction was applied. Crystal structures were solved by direct method and refined by

full-matrix least-squares method on  $F^2$  using the SHELXTL-2014 software package. Anisotropic thermal parameters were used to refine all non-hydrogen atoms. Since both structures include lots of heavy W atoms, the H atoms of water are not located. Also the thermal parameters of some C, N, and O atoms are restrained. A summary of the crystallographic data and structure determination for two compounds are provided in Table S1. Selected bond lengths and angles for compounds **1** and **2** are given in Table S2-S3.

**Table. S1** The Crystallographic data of compounds **1** and **2**.

| Compound                                   | <b>1</b>                                  | <b>2</b>                                  |
|--------------------------------------------|-------------------------------------------|-------------------------------------------|
| Empirical formula                          | $C_{55}H_{111}N_{35}O_{108}B_2Co_5W_{24}$ | $C_{55}H_{107}N_{35}O_{106}B_2Zn_5W_{24}$ |
| Formula weight                             | 7719.45                                   | 7715.62                                   |
| Temperature (K)                            | 296(2)                                    | 296(2)                                    |
| Wavelength (Å)                             | 0.71073                                   | 0.71073                                   |
| Crystal system                             | Triclinic                                 | Triclinic                                 |
| Space group                                | P-1                                       | P-1                                       |
| a (Å)                                      | 13.2288(16)                               | 13.0563(13)                               |
| b (Å)                                      | 23.019(3)                                 | 22.736(2)                                 |
| c (Å)                                      | 25.386(3)                                 | 25.199(3)                                 |
| $\alpha$ (°)                               | 87.375(2)                                 | 87.6450(10)                               |
| $\beta$ (°)                                | 80.115(2)                                 | 79.8300(10)                               |
| $\gamma$ (°)                               | 85.161(2)                                 | 84.8880(10)                               |
| Volume (Å <sup>3</sup> )                   | 7584.7(16)                                | 7331.1(13)                                |
| Z                                          | 2                                         | 2                                         |
| Calculated density (Mg / m <sup>3</sup> )  | 3.380                                     | 3.495                                     |
| Absorption coefficient (mm <sup>-1</sup> ) | 18.758                                    | 19.657                                    |
| F(000)                                     | 6942                                      | 6932                                      |
| Crystal size (mm <sup>3</sup> )            | 0.12 × 0.06 × 0.02                        | 0.12 × 0.02 × 0.02                        |
| Limiting indices                           | -16 ≤ h ≤ 15                              | -14 ≤ h ≤ 15                              |
|                                            | -27 ≤ k ≤ 27                              | -25 ≤ k ≤ 27                              |
|                                            | -30 ≤ l ≤ 30                              | -30 ≤ l ≤ 30                              |
| Reflections collected                      | 55248                                     | 52966                                     |
| Independent reflection                     | 27484 [R(int) = 0.0570]                   | 26535 [R(int) = 0.0619]                   |
| Completeness (%)                           | 98.4                                      | 98.1                                      |
| Refinement method                          | Full-matrix least-squares on $F^2$        | Full-matrix least-squares on $F^2$        |
| Data / restraints / parameters             | 27484 / 311 / 2072                        | 26535 / 1180 / 2053                       |
| Goodness-of-fit on $F^2$                   | 1.024                                     | 1.066                                     |
| Final R indices [I > 2σ(I)]                | $R_1 = 0.0524$ , $wR_2 = 0.1300$          | $R_1 = 0.0711$ , $wR_2 = 0.1506$          |
| R indices (all data)                       | $R_1 = 0.0877$ , $wR_2 = 0.1459$          | $R_1 = 0.1223$ , $wR_2 = 0.1682$          |

$$^a R_1 = \Sigma ||F_o| - |F_c|| / \Sigma |F_o|; wR_2 = \Sigma [w(F_o^2 - F_c^2)^2] / \Sigma [w(F_o^2)^2]^{1/2}$$

**Table. S2** Selected bond lengths and angles for **1**

|                   |           |                   |           |
|-------------------|-----------|-------------------|-----------|
| Co(1)-O(1W)       | 2.135(8)  | Co(3)-O(85)       | 2.182(9)  |
| Co(1)-O(2W)       | 2.158(7)  | Co(3)-O(84)       | 2.206(9)  |
| Co(1)-O(59)       | 2.180(8)  | Co(3)-N(19)       | 2.207(9)  |
| Co(1)-O(42)       | 2.190(7)  | Co(4)-O(6W)       | 2.128(9)  |
| Co(1)-N(3)        | 2.195(10) | Co(4)-O(10)       | 2.137(8)  |
| Co(1)-N(4)        | 2.196(9)  | Co(4)-N(24)       | 2.188(10) |
| Co(1)-N(5)        | 2.224(10) | Co(4)-O(63)       | 2.195(9)  |
| Co(2)-N(11)       | 2.151(8)  | Co(4)-N(25)       | 2.199(9)  |
| Co(2)-O(1)        | 2.152(8)  | Co(4)-N(26)       | 2.207(11) |
| Co(2)-O(82)       | 2.160(8)  | Co(4)-O(77)       | 2.208(8)  |
| Co(2)-N(10)       | 2.186(10) | Co(5)-O(8W)       | 2.123(11) |
| Co(2)-N(12)       | 2.198(9)  | Co(5)-N(32)       | 2.137(13) |
| Co(2)-O(30)       | 2.229(8)  | Co(5)-O(89)       | 2.139(10) |
| Co(2)-O(3W)       | 2.234(8)  | Co(5)-N(33)       | 2.142(12) |
| Co(3)-N(18)       | 2.114(11) | Co(5)-O(7W)       | 2.172(11) |
| Co(3)-O(5W)       | 2.147(9)  | Co(5)-N(31)       | 2.178(12) |
| Co(3)-O(4W)       | 2.154(10) | Co(5)-O(90)       | 2.221(11) |
| Co(3)-N(17)       | 2.181(10) | N(31)-Co(5)-O(90) | 148.3(4)  |
| O(1W)-Co(1)-O(2W) | 172.5(3)  | N(17)-Co(3)-O(85) | 71.9(3)   |
| O(1W)-Co(1)-O(59) | 85.6(2)   | N(18)-Co(3)-O(84) | 140.6(3)  |
| O(2W)-Co(1)-O(59) | 90.6(2)   | O(5W)-Co(3)-O(84) | 94.4(2)   |
| O(1W)-Co(1)-O(42) | 87.4(2)   | O(4W)-Co(3)-O(84) | 86.0(3)   |
| O(2W)-Co(1)-O(42) | 85.4(2)   | N(17)-Co(3)-O(84) | 148.3(3)  |
| O(59)-Co(1)-O(42) | 76.8(3)   | O(85)-Co(3)-O(84) | 76.6(3)   |
| O(1W)-Co(1)-N(3)  | 92.3(3)   | N(18)-Co(3)-N(19) | 71.1(4)   |
| O(2W)-Co(1)-N(3)  | 92.6(3)   | O(5W)-Co(3)-N(19) | 87.5(3)   |
| O(59)-Co(1)-N(3)  | 70.9(2)   | O(4W)-Co(3)-N(19) | 98.2(4)   |
| O(42)-Co(1)-N(3)  | 147.6(2)  | N(17)-Co(3)-N(19) | 142.2(4)  |
| O(1W)-Co(1)-N(4)  | 94.6(3)   | O(85)-Co(3)-N(19) | 145.7(3)  |
| O(2W)-Co(1)-N(4)  | 92.4(3)   | O(84)-Co(3)-N(19) | 69.5(3)   |
| O(59)-Co(1)-N(4)  | 141.6(3)  | O(6W)-Co(4)-O(10) | 169.2(3)  |
| O(42)-Co(1)-N(4)  | 141.7(3)  | O(6W)-Co(4)-N(24) | 83.0(4)   |
| N(3)-Co(1)-N(4)   | 70.6(4)   | O(10)-Co(4)-N(24) | 92.3(3)   |
| O(1W)-Co(1)-N(5)  | 92.7(3)   | O(6W)-Co(4)-O(63) | 84.7(3)   |
| O(2W)-Co(1)-N(5)  | 87.1(3)   | O(10)-Co(4)-O(63) | 84.6(3)   |
| O(59)-Co(1)-N(5)  | 148.4(2)  | N(24)-Co(4)-O(63) | 72.9(3)   |
| O(42)-Co(1)-N(5)  | 71.6(2)   | O(6W)-Co(4)-N(25) | 94.8(4)   |
| N(3)-Co(1)-N(5)   | 140.6(3)  | O(10)-Co(4)-N(25) | 92.5(2)   |
| N(4)-Co(1)-N(5)   | 70.0(4)   | N(24)-Co(4)-N(25) | 68.9(4)   |
| N(11)-Co(2)-O(1)  | 92.2(2)   | O(63)-Co(4)-N(25) | 141.5(2)  |
| N(11)-Co(2)-O(82) | 142.1(3)  | O(6W)-Co(4)-N(26) | 97.6(4)   |
| O(1)-Co(2)-O(82)  | 87.2(3)   | O(10)-Co(4)-N(26) | 92.2(2)   |
| N(11)-Co(2)-N(10) | 71.0(3)   | N(24)-Co(4)-N(26) | 140.0(4)  |

|                   |          |                   |          |
|-------------------|----------|-------------------|----------|
| O(1)-Co(2)-N(10)  | 84.8(2)  | O(63)-Co(4)-N(26) | 147.1(2) |
| O(82)-Co(2)-N(10) | 146.3(2) | N(25)-Co(4)-N(26) | 71.3(3)  |
| N(11)-Co(2)-N(12) | 70.3(3)  | O(6W)-Co(4)-O(77) | 89.1(3)  |
| O(1)-Co(2)-N(12)  | 92.0(2)  | O(10)-Co(4)-O(77) | 90.1(3)  |
| O(82)-Co(2)-N(12) | 71.9(2)  | N(24)-Co(4)-O(77) | 149.8(3) |
| N(10)-Co(2)-N(12) | 140.9(3) | O(63)-Co(4)-O(77) | 77.4(3)  |
| N(11)-Co(2)-O(30) | 142.1(3) | N(25)-Co(4)-O(77) | 141.0(2) |
| O(1)-Co(2)-O(30)  | 89.2(3)  | N(26)-Co(4)-O(77) | 69.8(2)  |
| O(82)-Co(2)-O(30) | 75.8(3)  | O(8W)-Co(5)-N(32) | 92.3(5)  |
| N(10)-Co(2)-O(30) | 71.5(2)  | O(8W)-Co(5)-O(89) | 90.8(4)  |
| N(12)-Co(2)-O(30) | 147.5(2) | N(32)-Co(5)-O(89) | 142.6(4) |
| N(11)-Co(2)-O(3W) | 90.2(3)  | O(8W)-Co(5)-N(33) | 92.8(5)  |
| O(1)-Co(2)-O(3W)  | 176.9(2) | N(32)-Co(5)-N(33) | 69.2(5)  |
| O(82)-Co(2)-O(3W) | 89.8(2)  | O(89)-Co(5)-N(33) | 147.9(5) |
| N(10)-Co(2)-O(3W) | 97.8(3)  | O(8W)-Co(5)-O(7W) | 176.9(4) |
| N(12)-Co(2)-O(3W) | 87.1(3)  | N(32)-Co(5)-O(7W) | 90.8(5)  |
| O(30)-Co(2)-O(3W) | 90.0(2)  | O(89)-Co(5)-O(7W) | 86.9(4)  |
| N(18)-Co(3)-O(5W) | 85.0(4)  | N(33)-Co(5)-O(7W) | 88.1(5)  |
| N(18)-Co(3)-O(4W) | 98.5(4)  | O(8W)-Co(5)-N(31) | 86.0(5)  |
| O(5W)-Co(3)-O(4W) | 174.0(3) | N(32)-Co(5)-N(31) | 70.3(5)  |
| N(18)-Co(3)-N(17) | 71.1(4)  | O(89)-Co(5)-N(31) | 72.8(4)  |
| O(5W)-Co(3)-N(17) | 88.4(4)  | N(33)-Co(5)-N(31) | 139.3(5) |
| O(4W)-Co(3)-N(17) | 88.1(4)  | O(7W)-Co(5)-N(31) | 95.3(5)  |
| N(18)-Co(3)-O(85) | 142.7(3) | O(8W)-Co(5)-O(90) | 87.8(4)  |
| O(5W)-Co(3)-O(85) | 90.2(2)  | N(32)-Co(5)-O(90) | 141.0(4) |
| O(4W)-Co(3)-O(85) | 84.1(3)  | O(89)-Co(5)-O(90) | 76.3(4)  |
| O(7W)-Co(5)-O(90) | 89.7(4)  | N(33)-Co(5)-O(90) | 71.9(5)  |

**Table. S3** Selected bond lengths and angles for **2**

|             |           |             |           |
|-------------|-----------|-------------|-----------|
| Zn(1)-O(1W) | 2.102(11) | Zn(3)-O(85) | 2.247(13) |
| Zn(1)-O(2W) | 2.123(10) | Zn(3)-N(19) | 2.251(14) |
| Zn(1)-O(42) | 2.177(10) | Zn(3)-O(84) | 2.284(12) |
| Zn(1)-N(4)  | 2.186(12) | Zn(4)-O(10) | 2.094(12) |
| Zn(1)-O(59) | 2.207(11) | Zn(4)-O(6W) | 2.11(2)   |
| Zn(1)-N(3)  | 2.218(14) | Zn(4)-N(26) | 2.186(18) |
| Zn(1)-N(5)  | 2.243(13) | Zn(4)-O(77) | 2.195(12) |
| Zn(2)-O(1)  | 2.132(10) | Zn(4)-N(24) | 2.21(2)   |
| Zn(2)-O(82) | 2.172(11) | Zn(4)-O(63) | 2.263(19) |
| Zn(2)-O(3W) | 2.189(11) | Zn(4)-N(25) | 2.27(2)   |
| Zn(2)-N(11) | 2.195(13) | Zn(5)-O(8W) | 2.092(15) |
| Zn(2)-N(10) | 2.203(12) | Zn(5)-O(7W) | 2.122(16) |
| Zn(2)-N(12) | 2.205(13) | Zn(5)-O(89) | 2.184(17) |
| Zn(2)-O(30) | 2.228(10) | Zn(5)-N(32) | 2.199(15) |
| Zn(3)-O(4W) | 2.091(12) | Zn(5)-N(31) | 2.209(19) |

|                   |           |                   |           |
|-------------------|-----------|-------------------|-----------|
| Zn(3)-O(5W)       | 2.091(11) | Zn(5)-N(33)       | 2.239(17) |
| Zn(3)-N(18)       | 2.131(15) | Zn(5)-O(90)       | 2.302(17) |
| Zn(3)-N(17)       | 2.194(14) | N(33)-Zn(5)-O(90) | 69.1(6)   |
| O(1W)-Zn(1)-O(2W) | 170.2(4)  | O(4W)-Zn(3)-N(19) | 100.9(5)  |
| O(1W)-Zn(1)-O(42) | 87.0(3)   | O(5W)-Zn(3)-N(19) | 87.3(5)   |
| O(2W)-Zn(1)-O(42) | 83.6(3)   | N(18)-Zn(3)-N(19) | 70.7(5)   |
| O(1W)-Zn(1)-N(4)  | 95.1(4)   | N(17)-Zn(3)-N(19) | 142.3(5)  |
| O(2W)-Zn(1)-N(4)  | 94.0(4)   | O(85)-Zn(3)-N(19) | 146.2(4)  |
| O(42)-Zn(1)-N(4)  | 140.9(3)  | O(4W)-Zn(3)-O(84) | 82.8(3)   |
| O(1W)-Zn(1)-O(59) | 85.4(3)   | O(5W)-Zn(3)-O(84) | 92.8(3)   |
| O(2W)-Zn(1)-O(59) | 89.8(3)   | N(18)-Zn(3)-O(84) | 139.4(4)  |
| O(42)-Zn(1)-O(59) | 77.9(4)   | N(17)-Zn(3)-O(84) | 148.9(4)  |
| N(4)-Zn(1)-O(59)  | 141.2(3)  | O(85)-Zn(3)-O(84) | 78.0(4)   |
| O(1W)-Zn(1)-N(3)  | 91.2(5)   | N(19)-Zn(3)-O(84) | 68.8(4)   |
| O(2W)-Zn(1)-N(3)  | 95.3(4)   | O(10)-Zn(4)-O(6W) | 157.8(6)  |
| O(42)-Zn(1)-N(3)  | 148.7(3)  | O(10)-Zn(4)-N(26) | 95.0(5)   |
| N(4)-Zn(1)-N(3)   | 70.3(5)   | O(6W)-Zn(4)-N(26) | 107.1(8)  |
| O(59)-Zn(1)-N(3)  | 70.8(3)   | O(10)-Zn(4)-O(77) | 92.6(4)   |
| O(1W)-Zn(1)-N(5)  | 92.2(4)   | O(6W)-Zn(4)-O(77) | 92.2(5)   |
| O(2W)-Zn(1)-N(5)  | 87.5(4)   | N(26)-Zn(4)-O(77) | 70.5(4)   |
| O(42)-Zn(1)-N(5)  | 71.3(3)   | O(10)-Zn(4)-N(24) | 89.5(7)   |
| N(4)-Zn(1)-N(5)   | 69.7(5)   | O(6W)-Zn(4)-N(24) | 75.5(9)   |
| O(59)-Zn(1)-N(5)  | 149.2(3)  | N(26)-Zn(4)-N(24) | 140.0(8)  |
| N(3)-Zn(1)-N(5)   | 140.0(5)  | O(77)-Zn(4)-N(24) | 149.2(7)  |
| O(1)-Zn(2)-O(82)  | 87.9(4)   | O(10)-Zn(4)-O(63) | 85.6(6)   |
| O(1)-Zn(2)-O(3W)  | 177.8(3)  | O(6W)-Zn(4)-O(63) | 73.8(6)   |
| O(82)-Zn(2)-O(3W) | 90.0(3)   | N(26)-Zn(4)-O(63) | 151.4(5)  |
| O(1)-Zn(2)-N(11)  | 90.3(3)   | O(77)-Zn(4)-O(63) | 80.9(6)   |
| O(82)-Zn(2)-N(11) | 142.3(3)  | N(24)-Zn(4)-O(63) | 68.6(7)   |
| O(3W)-Zn(2)-N(11) | 91.6(4)   | O(10)-Zn(4)-N(25) | 92.5(5)   |
| O(1)-Zn(2)-N(10)  | 80.9(3)   | O(6W)-Zn(4)-N(25) | 97.3(8)   |
| O(82)-Zn(2)-N(10) | 146.0(3)  | N(26)-Zn(4)-N(25) | 70.6(7)   |
| O(3W)-Zn(2)-N(10) | 100.7(4)  | O(77)-Zn(4)-N(25) | 141.0(5)  |
| N(11)-Zn(2)-N(10) | 70.2(5)   | N(24)-Zn(4)-N(25) | 69.5(9)   |
| O(1)-Zn(2)-N(12)  | 93.2(3)   | O(63)-Zn(4)-N(25) | 138.0(5)  |
| O(82)-Zn(2)-N(12) | 71.7(3)   | O(8W)-Zn(5)-O(7W) | 169.8(6)  |
| O(3W)-Zn(2)-N(12) | 86.5(4)   | O(8W)-Zn(5)-O(89) | 87.0(7)   |
| N(11)-Zn(2)-N(12) | 70.8(5)   | O(7W)-Zn(5)-O(89) | 85.6(6)   |
| N(10)-Zn(2)-N(12) | 140.5(5)  | O(8W)-Zn(5)-N(32) | 96.4(6)   |
| O(1)-Zn(2)-O(30)  | 88.7(4)   | O(7W)-Zn(5)-N(32) | 93.7(6)   |
| O(82)-Zn(2)-O(30) | 76.3(4)   | O(89)-Zn(5)-N(32) | 143.2(6)  |
| O(3W)-Zn(2)-O(30) | 90.4(3)   | O(8W)-Zn(5)-N(31) | 89.9(7)   |
| N(11)-Zn(2)-O(30) | 141.3(3)  | O(7W)-Zn(5)-N(31) | 94.6(6)   |
| N(10)-Zn(2)-O(30) | 71.5(3)   | O(89)-Zn(5)-N(31) | 72.4(7)   |

|                   |          |                   |          |
|-------------------|----------|-------------------|----------|
| N(12)-Zn(2)-O(30) | 147.8(3) | N(32)-Zn(5)-N(31) | 70.9(6)  |
| O(4W)-Zn(3)-O(5W) | 168.4(5) | O(8W)-Zn(5)-N(33) | 90.2(6)  |
| O(4W)-Zn(3)-N(18) | 102.6(5) | O(7W)-Zn(5)-N(33) | 92.1(6)  |
| O(5W)-Zn(3)-N(18) | 87.7(5)  | O(89)-Zn(5)-N(33) | 147.5(6) |
| O(4W)-Zn(3)-N(17) | 89.3(5)  | N(32)-Zn(5)-N(33) | 69.3(6)  |
| O(5W)-Zn(3)-N(17) | 88.9(5)  | N(31)-Zn(5)-N(33) | 140.0(6) |
| N(18)-Zn(3)-N(17) | 71.6(5)  | O(8W)-Zn(5)-O(90) | 84.2(6)  |
| O(4W)-Zn(3)-O(85) | 80.3(3)  | O(7W)-Zn(5)-O(90) | 87.4(6)  |
| O(5W)-Zn(3)-O(85) | 88.4(3)  | O(89)-Zn(5)-O(90) | 78.4(6)  |
| N(18)-Zn(3)-O(85) | 142.5(4) | N(32)-Zn(5)-O(90) | 138.4(6) |
| N(17)-Zn(3)-O(85) | 71.1(4)  | N(31)-Zn(5)-O(90) | 150.5(6) |

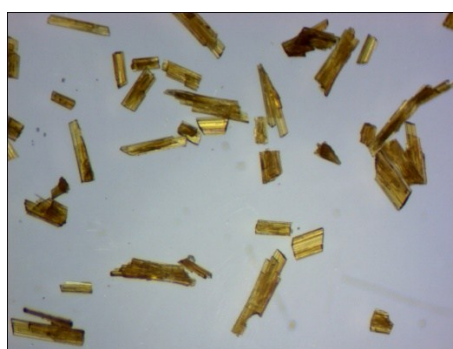

**Fig. S1** Microscope image of compound **1**

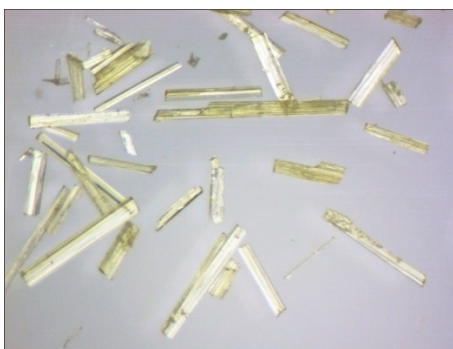

**Fig. S2** Microscope image of compound **2**

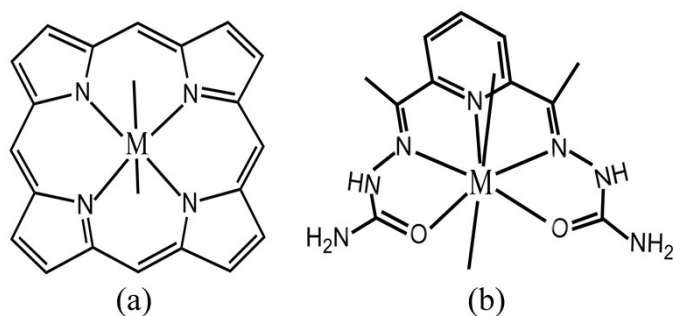

**Fig. S3** The coordination models in porphyrin complex (a) and DAPSC (b).

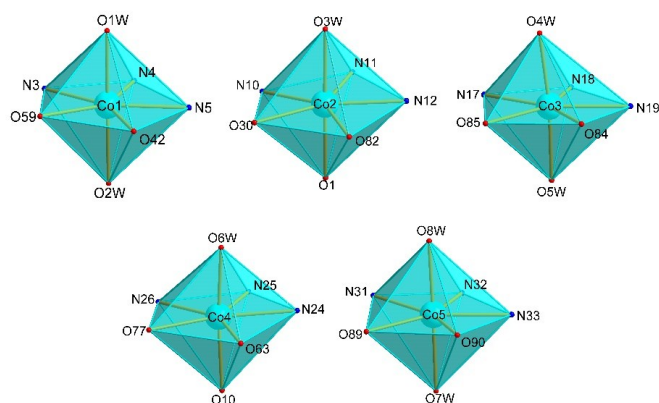

**Fig. S4** The coordination modes of Co ion in compound **1**.

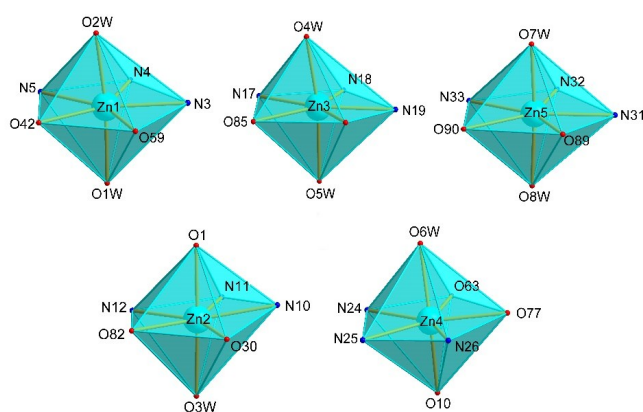

**Fig. S5** The coordination modes of Zn ion in compound **2**.

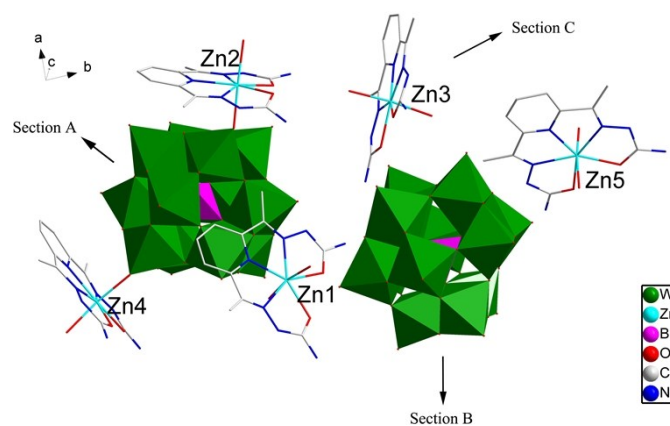

**Fig. S6** Stick and polyhedral representation of the asymmetric unit of compound **2**. The hydrogen atoms, crystallization water molecules are omitted for clarity.



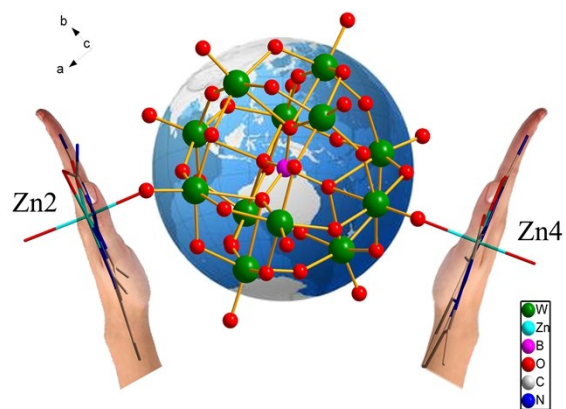

Fig. S7 Ball and Stick representation of Section A in compound 2.

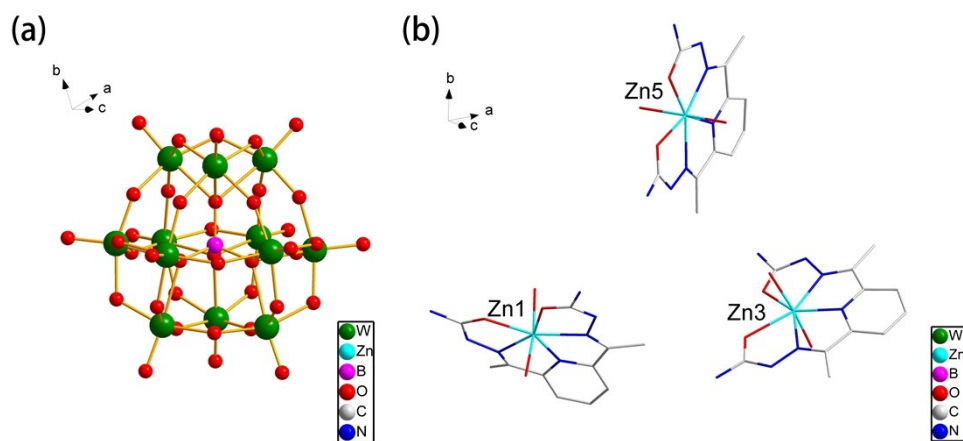

Fig. S8 Ball and Stick representation of Section B (a) and Section C (b) in compound 2.

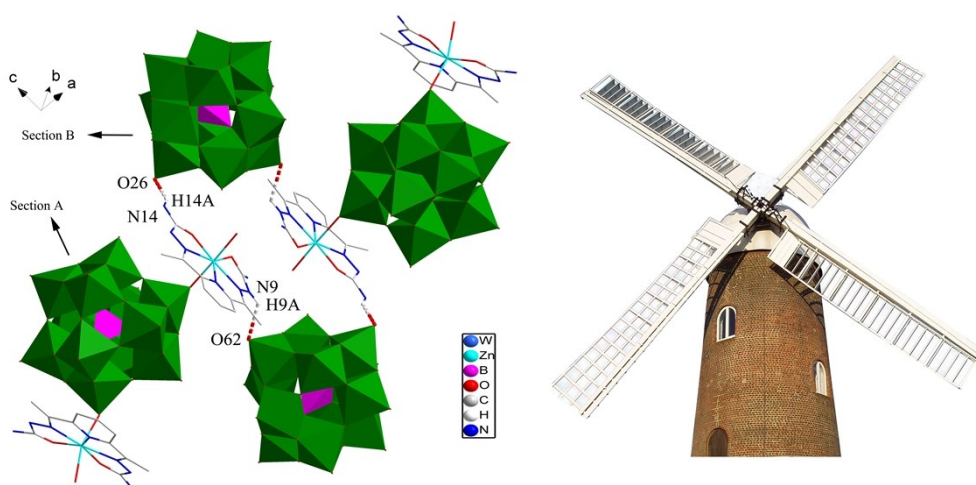

Fig. S9 Stick and polyhedral representation of the symmetrical windmill structure connected via hydrogen bonds in compound 2.

## 5. Supplementary Physical Characterizations.

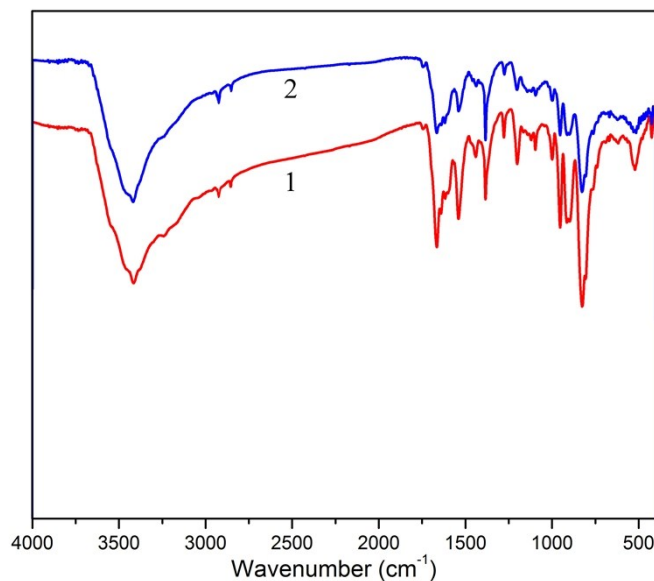

**Fig. S10** The IR spectra of compounds **1** (black) and **2** (red)

The IR spectra of compounds **1** and **2** are similar (Fig. S10). For compound **1**, the peak at  $999\text{ cm}^{-1}$  could be attributed to  $\nu(\text{B-O})$ , and bands at  $826\text{ cm}^{-1}$ ,  $914\text{ cm}^{-1}$ ,  $953\text{ cm}^{-1}$  could be associated with  $\nu(\text{W-O-W})$  and  $\nu(\text{W=O})$ . A series of bands in the region of  $1384$ ,  $1665$ ,  $2854$ ,  $2924\text{ cm}^{-1}$  could be ascribed to the character peaks of DAPSC ligand. Additionally, the broad peak at about  $3416\text{ cm}^{-1}$  reveals the presence of water molecules in the structure of **1**, which is consistent with the results of single crystal X-ray diffraction analysis. In the spectrum of **2**, the bands at  $998$ ,  $827$ ,  $913$ ,  $953\text{ cm}^{-1}$  could be ascribed to  $\nu(\text{B-O})$ ,  $\nu(\text{W-O-W})$  and  $\nu(\text{W=O})$ . A series of bands in the  $1384$ ,  $1665$ ,  $2851$ ,  $2924\text{ cm}^{-1}$  could be ascribed to the character peaks of DAPSC ligand. Like **1**, the IR spectrum of **2** also exists a broad band at about  $3416\text{ cm}^{-1}$  associated with the water of crystallization. Both compounds **1** and **2** exhibit characteristic peaks of the  $[\text{BW}_{12}\text{O}_{40}]^{5-}$  polyoxoanion. It is noteworthy that compound **2** almost gives the same IR spectrum as compound **1**, which strongly suggests that they have the same molecular structure. Small shifts in the wavelengths of  $[\text{BW}_{12}\text{O}_{40}]^{5-}$  polyoxoanion characteristic peaks may be due to the diverse coordination environment.

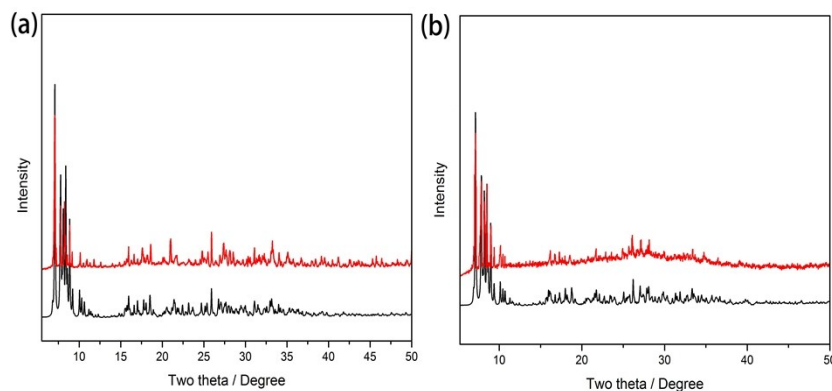

**Fig. S11** The simulated (black) and experimental (red) powder X-ray diffraction patterns for **1** (a) and **2** (b).

Powder X-ray diffraction (PXRD) measurements for compounds **1** and **2** were determined at room temperature (Fig. S11). The experimental powder X-ray diffraction patterns of compounds **1** and **2** are consistent with the simulated patterns derived from the single crystal X-ray diffraction data, showing the good purities of the sample phase.

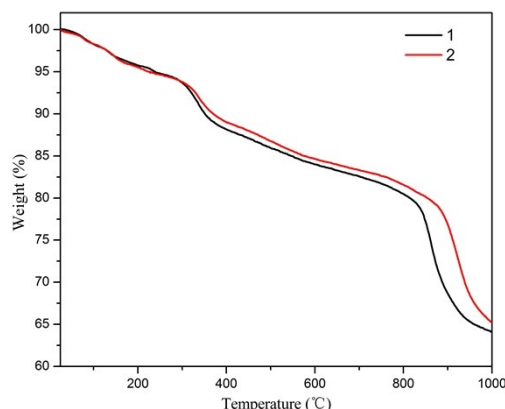

**Fig. S12.** The TG curves for **1** and **2**.

The thermal gravimetric analyses (TGA) of **1** and **2** are present in the Fig. S12. For compound **1**, TGA show three main steps of weight loss. The first weight loss of 5.18 % (calc. 4.20 %) in the temperature range of 25-250 °C is corresponding to the release of lattice water and coordinated water molecules. As the temperature reaches 250 °C, DAPSC ligands are removed and the framework collapses. Compound **1** lose a mass of 20.66 % (calc. 22.16 %) in the temperature range of 250-800 °C. The final product is the metal oxide. Similar to compound **1**, the TGA of compound **2** also show three main steps of weight loss. The first weight loss of 5.34 % (calc. 3.73 %) in the temperature range of 25-250 °C is associated with the release of lattice water and

coordinated water molecules. The second weight loss of 20.21 % (calc. 21.70 %) at 250-860 °C is ascribed to decomposition of the DAPSC ligands. The final product is the metal oxide.

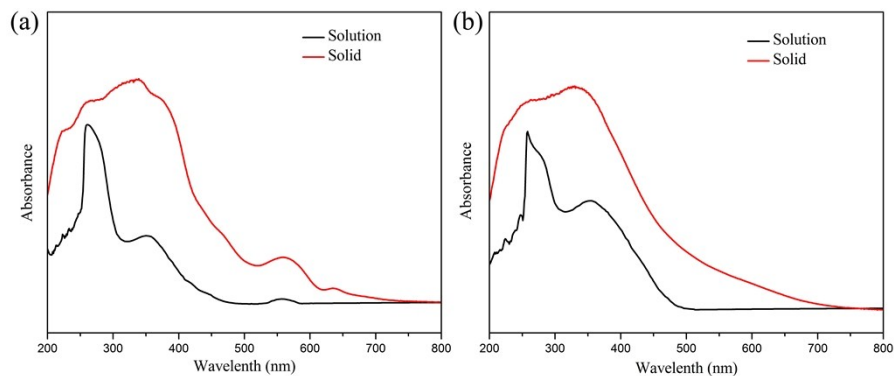

**Fig. S13** The UV-Vis absorption spectra of **1** (a) and **2** (b) in the solid and DMSO solution ( $2 \times 10^{-6}$  mol·L<sup>-1</sup>).

As shown in Fig. S13, the UV-Vis absorption spectra of **1** and **2** were recorded in the solid state and DMSO solution ( $2 \times 10^{-6}$  mol·L<sup>-1</sup>). In the spectrum of **1**, there are three main absorption bands. The absorption band at 260 nm are assigned to O→W charge-transfer transitions in the POMs structure. The second band at 350 nm corresponds to the  $\pi$ - $\pi^*$  transition within the C=N group. And the last band is observed at 554 nm due to d-d electron transition of Co center. Similar to **1**, **2** exhibits two main absorption bands around 258 and 351 nm, which are associated with O→W charge-transfer transitions, and the latter one is attributed to the  $\pi$ - $\pi^*$  transition C=N group.

**Table S4.** Comparison of the catalytic performances of the mixtures of Co-DAPSC complex and POMs at different ratios.<sup>[a]</sup>

| Entry | Catalyst<br>$n_A:n_B$ | Conversion (%) | Selectivity (%) |      |
|-------|-----------------------|----------------|-----------------|------|
|       |                       |                | MAP             | MDP  |
| 1     | 1:1                   | 31.92          | 98.67           | 1.33 |
| 2     | 2:3                   | 31.52          | 97.22           | 2.78 |
| 3     | 1:2                   | 31.21          | 98.63           | 1.37 |
| 4     | 2:5                   | 31.78          | 97.30           | 2.70 |
| 5     | 1:3                   | 30.98          | 98.65           | 1.35 |

<sup>[a]</sup> Reaction conditions: {Catalyst A:  $K_5BW_{12}O_{40}$  (0.026mmol compared with 0.1 g compounds **1** or **2**), B:  $[Co(DAPSC)Cl]Cl \cdot 2H_2O$ }, lauryl alcohol (0.10 mol), phosphoric acid (0.10 mol), no solvent, 90 °C, 1 h.

**Table S5.** Comparison of the catalytic performances of the mixtures of Zn-DAPSC complex and POMs at different ratios.<sup>[a]</sup>

| Entry | Catalyst                       | Conversion (%) | Selectivity (%) |      |
|-------|--------------------------------|----------------|-----------------|------|
|       | n <sub>A</sub> :n <sub>B</sub> |                | MAP             | MDP  |
| 1     | 1:1                            | 32.01          | 97.30           | 2.70 |
| 2     | 2:3                            | 30.95          | 97.22           | 2.78 |
| 3     | 1:2                            | 31.85          | 98.67           | 1.33 |
| 4     | 2:5                            | 31.60          | 97.35           | 2.65 |
| 5     | 1:3                            | 30.43          | 98.57           | 1.43 |

<sup>[a]</sup> Reaction conditions: Catalyst (A: K<sub>5</sub>BW<sub>12</sub>O<sub>40</sub>, B: [Zn(DAPSC)Cl]Cl·2H<sub>2</sub>O), lauryl alcohol (0.10 mol), phosphoric acid (0.10 mol), no solvent, 90 °C, 1 h.

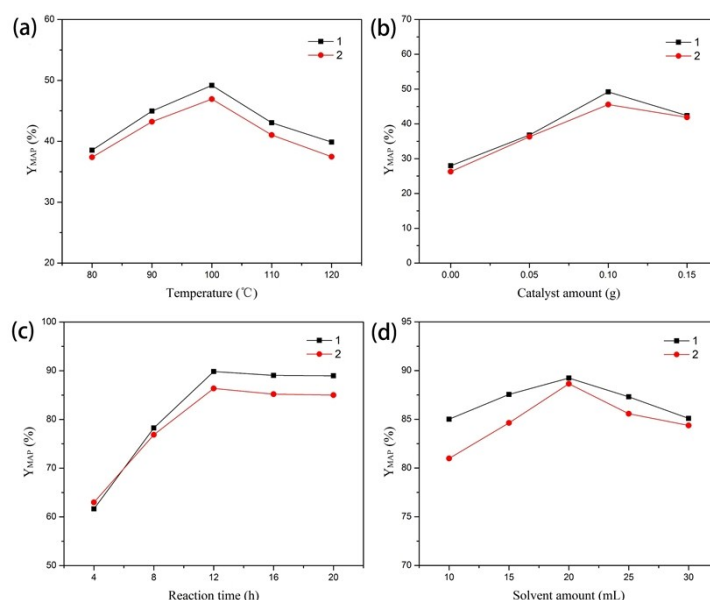

**Fig. S14** The yields of MAP at various reaction temperature (a), catalyst amount (b), reaction time (c) and solvent amount (d). Reaction conditions: (a) catalyst (0.10 g), lauryl alcohol (0.10 mol), phosphoric acid (0.10 mol), no solvent, 1 h; (b) lauryl alcohol (0.10 mol), phosphoric acid (0.10 mol), no solvent, 100 °C, 1 h; (c) catalyst (0.10 g), lauryl alcohol (0.10 mol), phosphoric acid (0.10 mol), no solvent, 100 °C; (d) catalyst (0.10 g), lauryl alcohol (0.10 mol), phosphoric acid (0.10 mol), 110 °C, 12 h.

**Table. S6** The yield and selectivity of MAP at various reaction temperature. <sup>[a]</sup>

| Catalyst | Temperature (°C) | Yield (%) | Selectivity (%) |
|----------|------------------|-----------|-----------------|
| <b>1</b> | 80               | 38.54     | 100             |
|          | 90               | 44.97     | 98.80           |
|          | 100              | 49.19     | 98.85           |

|          |     |       |       |
|----------|-----|-------|-------|
|          | 110 | 43.04 | 97.65 |
|          | 120 | 39.87 | 97.59 |
| <b>2</b> | 80  | 37.38 | 97.37 |
|          | 90  | 42.22 | 98.77 |
|          | 100 | 46.92 | 97.65 |
|          | 110 | 41.02 | 97.67 |
|          | 120 | 37.46 | 97.56 |

[a] Reaction conditions: catalyst (0.10 g), lauryl alcohol (0.10 mol), phosphoric acid (0.10 mol), no solvent, 1 h

**Table. S7** The yield and selectivity of MAP at various catalyst amount. <sup>[b]</sup>

| Catalyst | Catalyst amount (g) | Yield (%) | Selectivity (%) |
|----------|---------------------|-----------|-----------------|
| <b>1</b> | 0.05                | 36.81     | 97.53           |
|          | 0.10                | 49.19     | 98.85           |
|          | 0.15                | 42.39     | 97.62           |
| <b>2</b> | 0.05                | 36.29     | 97.47           |
|          | 0.10                | 45.57     | 97.65           |
|          | 0.15                | 41.89     | 97.59           |

[b] Reaction conditions: lauryl alcohol (0.10 mol), phosphoric acid (0.10 mol), no solvent, 100 °C, 1 h

**Table. S8** The yield and selectivity of MAP at various reaction time. <sup>[c]</sup>

| Catalyst | Reaction Time (h) | Yield (%) | Selectivity (%) |
|----------|-------------------|-----------|-----------------|
| <b>1</b> | 4                 | 61.63     | 98.36           |
|          | 8                 | 78.26     | 97.44           |
|          | 12                | 89.83     | 98.88           |
|          | 16                | 89.05     | 97.70           |
|          | 20                | 88.95     | 99.44           |
| <b>2</b> | 4                 | 62.98     | 96.12           |
|          | 8                 | 76.86     | 97.47           |
|          | 12                | 86.37     | 98.31           |
|          | 16                | 85.18     | 98.83           |
|          | 20                | 85.01     | 98.87           |

[c] Reaction conditions: catalyst (0.10 g), lauryl alcohol (0.10 mol), phosphoric acid (0.10 mol), no solvent, 100 °C

**Table. S9** The yield and selectivity of MAP at various solvent amount. <sup>[d]</sup>

| Catalyst | Solvent amount (mL) | Yield (%) | Selectivity (%) |
|----------|---------------------|-----------|-----------------|
|          | 10                  | 85.01     | 98.86           |
|          | 15                  | 87.56     | 100             |

|          |    |       |       |
|----------|----|-------|-------|
| <b>1</b> | 20 | 89.24 | 98.88 |
|          | 25 | 87.31 | 99.43 |
|          | 30 | 85.09 | 99.44 |
| <b>2</b> | 10 | 80.99 | 99.43 |
|          | 15 | 84.63 | 98.84 |
|          | 20 | 88.65 | 98.86 |
|          | 25 | 85.57 | 99.43 |
|          | 30 | 84.37 | 99.43 |

[d] Reaction conditions: catalyst (0.10 g), lauryl alcohol (0.10 mol), phosphoric acid (0.10 mol), 110 °C, 12 h.

**Table. S10** Comparison of the catalytic performances of the various catalysts for the esterification of lauryl alcohol with phosphoric acid.

| Entry | Catalyst               | Conversion (%) | Selectivity (%) |      |
|-------|------------------------|----------------|-----------------|------|
|       |                        |                | MAP             | MDP  |
| 1     | No catalyst            | 52.96          | 98.06           | 1.94 |
| 2     | $K_5BW_{12}O_{40}$     | 70.86          | 98.62           | 1.38 |
| 3     | DAPSC                  | 35.17          | 97.18           | 2.82 |
| 4     | $Co(Ac)_2 \cdot 4H_2O$ | 51.52          | 98.10           | 1.90 |
| 5     | $Zn(Ac)_2 \cdot 2H_2O$ | 52.65          | 98.08           | 1.92 |
| 6     | <b>1</b>               | 90.86          | 98.88           | 1.12 |
| 7     | <b>2</b>               | 87.85          | 98.31           | 1.69 |

Reaction conditions: catalyst (0.10 g), lauryl alcohol (0.10 mol), phosphoric acid (0.10 mol), no solvent, 100 °C, 12 h.
